# Supplementary material for: Differential Effect of SARS-CoV-2 Spike Glycoprotein 1 on Human Bronchial and Alveolar Lung Mucosa Models: Implications for Pathogenicity
Source: MDPI journal article supplement (doi:10.3390/v13122537), 2021-12-17
Supplement: s1 [file s1]

---

## Online Supplementary Material

### Transcriptomic analysis workflow:

The “Demultiplex QIAseq UPX 3’ reads” tool of the CLC Genomics Workbench 21.0.1 was used to demultiplex the raw sequencing reads according to the sample indices. The “Quantify QIAseq UPX 3’ workflow” was used to process the demultiplexed sequencing reads with default settings. In short, the reads are annotated with their UMI and are then trimmed for poly(A) and adapter sequences, minimum reads length (15 nucleotides), read quality, and ambiguous nucleotides (maximum of 2). They are then deduplicated using their UMI. Reads are grouped into UMI groups when they (1) start at the same position based on the end of the read to which the UMI is ligated (i.e., Read2 for paired data), (2) are from the same strand, and (3) have identical UMIs. Groups that contain only one read (singletons) are merged into non-singleton groups if the singleton’s UMI can be converted to a UMI of a non-singleton group by introducing an SNP (the biggest group is chosen). The reads were then mapped to the Human genome GRCh38. The ‘Empirical analysis of DGE’ algorithm of the CLC Genomics Workbench 21.0.1 was used for differential expression analysis with default settings. It is an implementation of the ‘Exact Test’ for two-group comparisons developed by Robinson and Smyth (2008, Small-sample estimation of negative binomial dispersion, with applications to SAGE data) and incorporated in the EdgeR Bioconductor package [1].

a. LDH assay

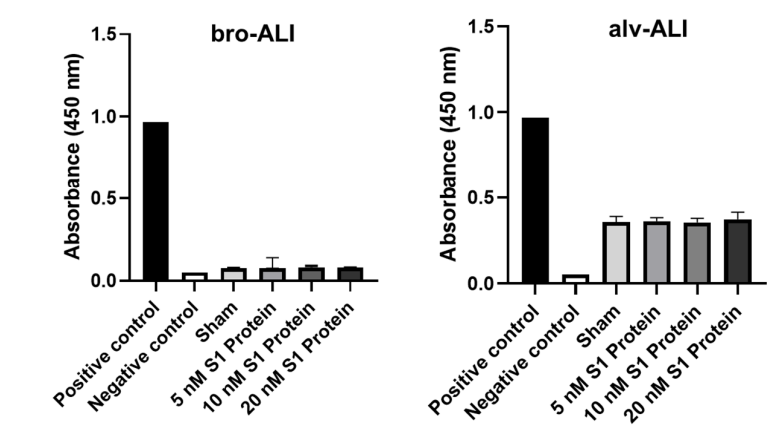

b. Propidium iodide assay

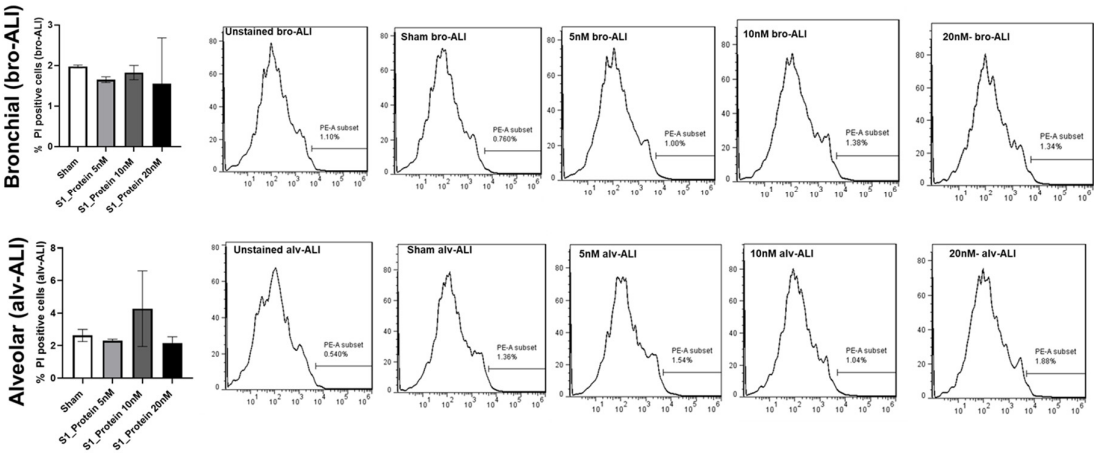

**Supplementary Figure S1.** Cell viability (based on membrane integrity) test was measured by colorimetric lactate dehydrogenase (LDH) assay as well as propidium iodide (PI) staining and flow cytometry.

**a.** LDH release was measured in the basal media. No significant alteration of cell viability was detected after exposure to recombinant S1 protein (5, 10, 20 nM) in both bronchial and alveolar lung mucosa model developed at the air-liquid interface (bro-ALI and alv-ALI) as shown in bar diagrams (n=3 per exposure condition). Corresponding sham served as control. Kit provided (Thermo Fisher scientific Rockford, IL, US, catalog # 88953) positive control was used for the assay. Cell culture media served as negative control. Data are presented as median and interquartile ranges in bar graphs.

**b.** Cells were washed with PBS after 24 hours of SARS-CoV-2 spike glycoprotein S1 (S1 protein) exposure and stained with PI solution. After 30 minutes of incubation, cells were assessed by flow cytometry using PE laser. No significant alteration of cell viability was detected after exposure to recombinant S1 protein (5, 10, 20 nM) in both bro-ALI and alv-ALI as shown in bar diagram (n=3 per exposure condition). Representative histograms show gated PI positive cells in percentage from each group. Y axis number of cells and X axis amount of fluorochrome (proportional to number of PI positive cells). Corresponding sham served as control. Data are presented as percentage positive PI cells and interquartile ranges in bar graphs.

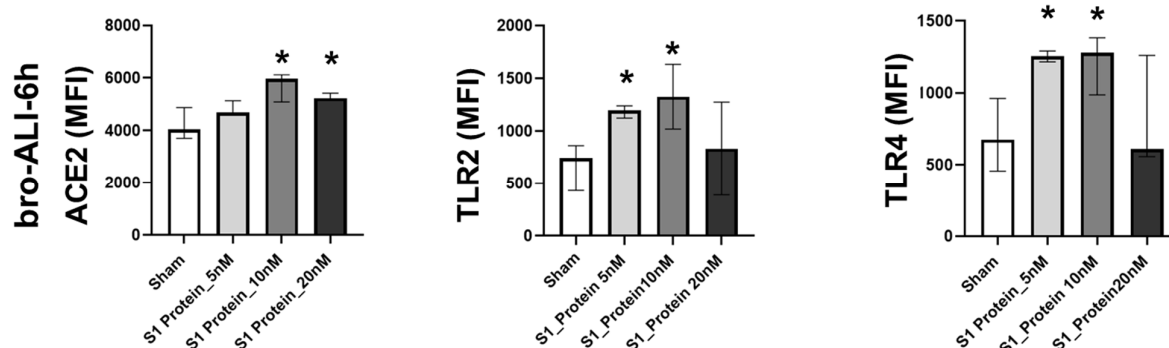

**Supplementary Figure S2.** Surface expression of angiotensin converting enzyme 2 (ACE2), toll like receptor 2 (TLR2), and TLR4 in bronchial mucosa model developed at air-liquid interface (bro-ALI). Bro-ALI was exposed to recombinant SARS-CoV-2 spike glycoprotein S1 (S1 protein; 5, 10 and 20 nM) for 6 hours (h) and compared to the corresponding sham. ACE2, TLR2, and TLR4 was measured by flow cytometry and data are presented as median fluorescent intensity (MFI) and interquartile ranges. n= 3 per exposure condition; \* significance:  $p < 0.05$  (Mann-Whitney U-test).

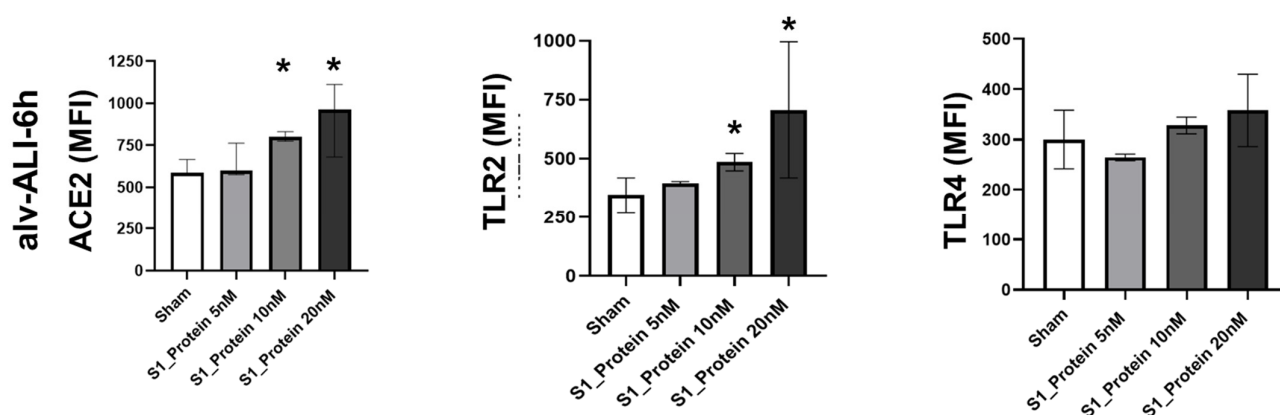

**Supplementary Figure S3.** Surface expression of angiotensin converting enzyme 2 (ACE2), toll like receptor 2 (TLR2), and TLR4 in alveolar mucosa model developed at air-liquid interface (alv-ALI). alv-ALI was exposed to recombinant SARS-CoV-2 spike glycoprotein S1 (S1 protein; 5, 10 and 20 nM) for 6 hours (h) and compared to the corresponding sham. ACE2, TLR2, and TLR4 was measured by flow cytometry and data are presented as median fluorescent intensity (MFI; interquartile range). n= 3 per exposure condition; \* significance:  $p < 0.05$  (Mann-Whitney U-test).

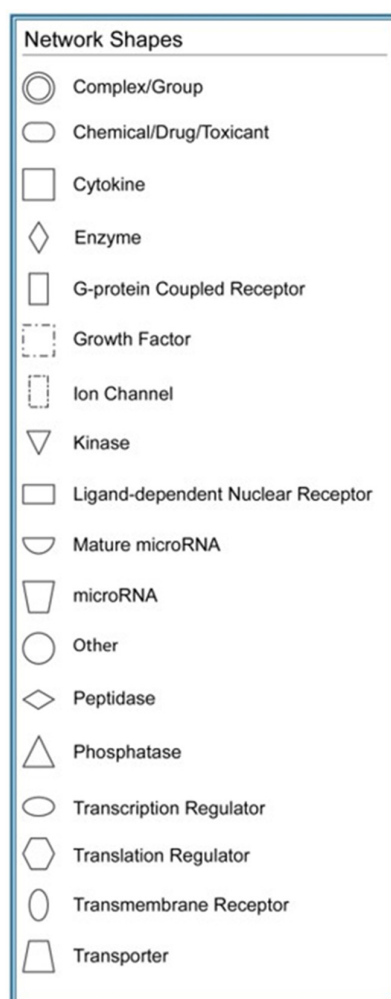

**Supplementary Figure S4.** Network shapes used in Ingenuity Pathway Analysis.

**Supplementary Table S1:** Detection limit values of the cytokines. LLOD: Lower limit of detection; ULOQ: Upper limit of quantification. For measuring interleukin (IL) 8, samples were diluted in the ratio of 1:30 and for the MSD Mesoscale analysis samples were diluted in the ratio of 1:2. IFN- $\gamma$ : Interferon gamma, TNF- $\alpha$ : tumor necrosis factor alpha.

| Assay         | LLOD<br>pg/mL | ULOQ<br>pg/mL |
|---------------|---------------|---------------|
| IFN- $\gamma$ | 0.4665        | 1560          |
| IL-10         | 0.0425        | 346           |
| IL-12p70      | 0.0780        | 447           |
| IL-13         | 0.5225        | 466           |
| IL-1 $\beta$  | 0.1373        | 583           |
| IL-2          | 0.0589        | 1250          |
| IL-4          | 0.0090        | 213           |
| IL-6          | 0.1112        | 663           |
| IL-8          | 31.25         | 2000          |
| TNF- $\alpha$ | 0,0494        | 338           |

**Supplementary Table S2:** Comparison of the fold increase of surface expression of angiotensin converting enzyme 2 (ACE2), toll like receptor 2 (TLR2), and TLR4 between the bronchial (bro-ALI) and alveolar (alv-ALI) mucosa model developed at air-liquid interface (ALI). Both bro-ALI and alv-ALI were exposed to 10 nM recombinant SARS-CoV-2 spike glycoprotein S1 (S1 protein) for 6 hour (h) and compared to the corresponding sham. bro-ALI was developed using human primary bronchial epithelial cells and alv-ALI using NCI-H441 (ATCC HTB-174) cell line as representative of human type II pneumocytes. ACE2, TLR2, and TLR4 was measured by flow cytometry. n= 6 per exposure condition; \* significance:  $p < 0.05$  (Mann-Whitney U-test).

|                                               | <b>bro-ALI</b><br>(Fold change) <sup>#</sup> | <b>alv-ALI</b><br>(Fold change) <sup>#</sup> | <b>alv-ALI/bro-ALI</b> |       |
|-----------------------------------------------|----------------------------------------------|----------------------------------------------|------------------------|-------|
|                                               |                                              |                                              | Fold change            | p     |
| <b>ACE2</b>                                   | 1.2*                                         | 1.5*                                         | 1.3*                   | 0.002 |
| <b>TLR2</b>                                   | 1.3*                                         | 1.4*                                         | 1.1                    | 0.48  |
| <b>TLR4</b>                                   | 1.3*                                         | 1.3*                                         | 1.0                    | 0.31  |
| <sup>#</sup> : compared to corresponding sham |                                              |                                              |                        |       |

**Supplementary Table S3.** List of significantly differentially regulated genes (Total: 117; upregulated: 77; down-regulated: 40) in the bronchial mucosa model developed at air-liquid interface (bro-ALI). bro-ALI was exposed to 10 nM recombinant SARS-CoV-2 spike glycoprotein S1 (S1 protein) for 24 hours and compared to sham. n= 6 per exposure condition; significance:  $p < 0.01$ . An additional filter was applied for expression  $> 0$  in at least 5 samples in at least one group.

|     | Symbol or ID           | Fold-change  | Description                                                   | Ensembl gene ID | Entrez    |
|-----|------------------------|--------------|---------------------------------------------------------------|-----------------|-----------|
| 1.  | <i>ENSG00000278878</i> | <b>11.90</b> |                                                               | ENSG00000278878 |           |
| 2.  | <i>EYA1</i>            | <b>9.76</b>  | EYA transcriptional coactivator and phosphatase 1             | ENSG00000104313 | 2138      |
| 3.  | <i>STARD4-AS1</i>      | <b>5.95</b>  | STARD4 antisense RNA 1                                        | ENSG00000246859 | 100505678 |
| 4.  | <i>CA9</i>             | <b>5.63</b>  | Carbonic anhydrase 9                                          | ENSG00000107159 | 768       |
| 5.  | <i>ZNF568</i>          | <b>5.39</b>  | Zinc finger protein 568                                       | ENSG00000198453 | 374900    |
| 6.  | <i>PPP3CB-AS1</i>      | <b>4.85</b>  | PPP3CB antisense RNA 1 (head to head)                         | ENSG00000221817 | 101929145 |
| 7.  | <i>TMBIM4</i>          | <b>4.47</b>  | Transmembrane BAX inhibitor motif containing 4                | ENSG00000228144 | 51643     |
| 8.  | <i>RASA4</i>           | <b>4.46</b>  | RAS p21 protein activator 4                                   | ENSG00000105808 | 10156     |
| 9.  | <i>ENSG00000273489</i> | <b>4.28</b>  |                                                               | ENSG00000273489 |           |
| 10. | <i>IQGAP3</i>          | <b>4.19</b>  | IQ motif containing GTPase activating protein 3               | ENSG00000183856 | 128239    |
| 11. | <i>ADARB1</i>          | <b>3.89</b>  | Adenosine deaminase RNA specific B1                           | ENSG00000197381 | 104       |
| 12. | <i>H1-3</i>            | <b>3.87</b>  | H1.3 linker histone, cluster member                           | ENSG00000124575 | 3007      |
| 13. | <i>ULBP1</i>           | <b>3.58</b>  | UL16 binding protein 1                                        | ENSG00000111981 | 80329     |
| 14. | <i>ENSG00000273221</i> | <b>3.09</b>  |                                                               | ENSG00000273221 |           |
| 15. | <i>RSAD2</i>           | <b>2.94</b>  | Radical S-adenosyl methionine domain containing 2             | ENSG00000134321 | 91543     |
| 16. | <i>ENSG00000280614</i> | <b>2.76</b>  |                                                               | ENSG00000280614 |           |
| 17. | <i>ENSG00000250135</i> | <b>2.70</b>  |                                                               | ENSG00000250135 |           |
| 18. | <i>ENSG00000280800</i> | <b>2.67</b>  |                                                               | ENSG00000280800 |           |
| 19. | <i>B3GNT4</i>          | <b>2.65</b>  | UDP-GlcNAc:betaGal beta-1,3-N-acetylglucosaminyltransferase 4 | ENSG00000176383 | 79369     |
| 20. | <i>CXCL10</i>          | <b>2.62</b>  | C-X-C motif chemokine ligand 10                               | ENSG00000169245 | 3627      |
| 21. | <i>TLCD5</i>           | <b>2.56</b>  | TLC domain containing 5                                       | ENSG00000181264 | 219902    |
| 22. | <i>VEGFC</i>           | <b>2.55</b>  | Vascular endothelial growth factor C                          | ENSG00000150630 | 7424      |
| 23. | <i>MX2</i>             | <b>2.50</b>  | MX dynamin like GTPase 2                                      | ENSG00000183486 | 4600      |
| 24. | <i>ENSG00000281181</i> | <b>2.50</b>  |                                                               | ENSG00000281181 |           |
| 25. | <i>ENSG00000269973</i> | <b>2.49</b>  |                                                               | ENSG00000269973 |           |
| 26. | <i>ENSG00000282034</i> | <b>2.45</b>  |                                                               | ENSG00000282034 |           |
| 27. | <i>IFIT1</i>           | <b>2.37</b>  | Interferon induced protein with tetratricopeptide repeats 1   | ENSG00000185745 | 3434      |
| 28. | <i>PINK1-AS</i>        | <b>2.33</b>  | PINK1 antisense RNA                                           | ENSG00000117242 | 100861548 |
| 29. | <i>IFIT3</i>           | <b>2.31</b>  | Interferon induced protein with tetratricopeptide repeats 3   | ENSG00000119917 | 3437      |
| 30. | <i>LINC01006</i>       | <b>2.28</b>  | Long intergenic non-protein coding RNA 1006                   | ENSG00000182648 | 100506380 |
| 31. | <i>ARHGAP23</i>        | <b>2.19</b>  | Rho GTPase activating protein 23                              | ENSG00000275832 | 57636     |
| 32. | <i>IFI6</i>            | <b>2.16</b>  | Interferon alpha inducible protein 6                          | ENSG00000126709 | 2537      |

|     |                        |             |                                                              |                 |        |
|-----|------------------------|-------------|--------------------------------------------------------------|-----------------|--------|
| 33. | <i>PRELID2</i>         | <b>2.14</b> | PRELI domain containing 2                                    | ENSG00000186314 | 153768 |
| 34. | <i>IFIT2</i>           | <b>2.14</b> | Interferon induced protein with tetratri-copeptide repeats 2 | ENSG00000119922 | 3433   |
| 35. | <i>MLKL</i>            | <b>2.09</b> | Mixed lineage kinase domain like pseudokinase                | ENSG00000168404 | 197259 |
| 36. | <i>CTHRC1</i>          | <b>2.09</b> | Collagen triple helix repeat containing 1                    | ENSG00000164932 | 115908 |
| 37. | <i>IFI44L</i>          | <b>1.99</b> | Interferon induced protein 44 like                           | ENSG00000137959 | 10964  |
| 38. | <i>AUTS2</i>           | <b>1.91</b> | Activator of transcription and developmental regulator AUTS2 | ENSG00000158321 | 26053  |
| 39. | <i>CASD1</i>           | <b>1.88</b> | CAS1 domain containing 1                                     | ENSG00000127995 | 64921  |
| 40. | <i>MX1</i>             | <b>1.84</b> | MX dynamin like GTPase 1                                     | ENSG00000157601 | 4599   |
| 41. | <i>HPS3</i>            | <b>1.84</b> | HPS3 biogenesis of lysosomal organelles complex 2 subunit 1  | ENSG00000163755 | 84343  |
| 42. | <i>OAS2</i>            | <b>1.84</b> | 2'-5'-oligoadenylate synthetase 2                            | ENSG00000111335 | 4939   |
| 43. | <i>ENSG00000225963</i> | <b>1.82</b> |                                                              | ENSG00000225963 |        |
| 44. | <i>DDX10</i>           | <b>1.79</b> | DEAD-box helicase 10                                         | ENSG00000178105 | 1662   |
| 45. | <i>IFIT5</i>           | <b>1.77</b> | Interferon induced protein with tetratri-copeptide repeats 5 | ENSG00000152778 | 24138  |
| 46. | <i>KLK7</i>            | <b>1.74</b> | Kallikrein related peptidase 7                               | ENSG00000169035 | 5650   |
| 47. | <i>TXLNG</i>           | <b>1.74</b> | Taxilin gamma                                                | ENSG00000086712 | 55787  |
| 48. | <i>MAPK7</i>           | <b>1.69</b> | Mitogen-activated protein kinase 7                           | ENSG00000166484 | 5598   |
| 49. | <i>DDX58</i>           | <b>1.69</b> | DEXD/H-box helicase 58                                       | ENSG00000107201 | 23586  |
| 50. | <i>CORO1C</i>          | <b>1.61</b> | coronin 1C                                                   | ENSG00000110880 | 23603  |
| 51. | <i>APOBEC3B</i>        | <b>1.61</b> | Apolipoprotein B mRNA editing enzyme catalytic subunit 3B    | ENSG00000179750 | 9582   |
| 52. | <i>XAF1</i>            | <b>1.60</b> | XIAP associated factor 1                                     | ENSG00000132530 | 54739  |
| 53. | <i>SP110</i>           | <b>1.60</b> | SP110 nuclear body protein                                   | ENSG00000135899 | 3431   |
| 54. | <i>ISG15</i>           | <b>1.60</b> | ISG15 ubiquitin like modifier                                | ENSG00000187608 | 9636   |
| 55. | <i>IFIH1</i>           | <b>1.59</b> | Interferon induced with helicase C domain 1                  | ENSG00000115267 | 64135  |
| 56. | <i>PTPN13</i>          | <b>1.56</b> | Protein tyrosine phosphatase non-receptor type 13            | ENSG00000163629 | 5783   |
| 57. | <i>SAMD4A</i>          | <b>1.56</b> | Sterile alpha motif domain containing 4A                     | ENSG00000020577 | 23034  |
| 58. | <i>GBP1</i>            | <b>1.52</b> | Guanylate binding protein 1                                  | ENSG00000117228 | 2633   |
| 59. | <i>PPM1K</i>           | <b>1.50</b> | Protein phosphatase, Mg2+/Mn2+ dependent 1K                  | ENSG00000163644 | 152926 |
| 60. | <i>CWC22</i>           | <b>1.50</b> | CWC22 spliceosome associated protein homolog                 | ENSG00000163510 | 57703  |
| 61. | <i>OMA1</i>            | <b>1.48</b> | OMA1 zinc metallopeptidase                                   | ENSG00000162600 | 115209 |
| 62. | <i>QPRT</i>            | <b>1.46</b> | Quinolate phosphoribosyltransferase                          | ENSG00000103485 | 23475  |
| 63. | <i>SAMD9</i>           | <b>1.45</b> | Sterile alpha motif domain containing 9                      | ENSG00000205413 | 54809  |
| 64. | <i>PPP2CB</i>          | <b>1.45</b> | Protein phosphatase 2 catalytic subunit beta                 | ENSG00000104695 | 5516   |
| 65. | <i>TLE4</i>            | <b>1.44</b> | TLE family member 4, transcriptional corepressor             | ENSG00000106829 | 7091   |
| 66. | <i>NT5C3A</i>          | <b>1.44</b> | 5'-nucleotidase, cytosolic IIIA                              | ENSG00000122643 | 51251  |



|      |                 |              |                                                           |                 |        |
|------|-----------------|--------------|-----------------------------------------------------------|-----------------|--------|
| 67.  | <i>IRF7</i>     | <b>1.39</b>  | Interferon regulatory factor 7                            | ENSG00000185507 | 3665   |
| 68.  | <i>DEK</i>      | <b>1.39</b>  | DEK proto-oncogene                                        | ENSG00000124795 | 7913   |
| 69.  | <i>CMIP</i>     | <b>1.39</b>  | c-Maf inducing protein                                    | ENSG00000153815 | 80790  |
| 70.  | <i>IFI27</i>    | <b>1.37</b>  | Interferon alpha inducible protein 27                     | ENSG00000165949 | 3429   |
| 71.  | <i>PNPT1</i>    | <b>1.36</b>  | Polyribonucleotide nucleotidyltransferase 1               | ENSG00000138035 | 87178  |
| 72.  | <i>IFITM1</i>   | <b>1.34</b>  | Interferon induced transmembrane protein 1                | ENSG00000185885 | 8519   |
| 73.  | <i>UCK2</i>     | <b>1.34</b>  | Uridine-cytidine kinase 2                                 | ENSG00000143179 | 7371   |
| 74.  | <i>CAPS</i>     | <b>1.33</b>  | Calcyphosine                                              | ENSG00000105519 | 828    |
| 75.  | <i>EIF2AK2</i>  | <b>1.32</b>  | Eukaryotic translation initiation factor 2 alpha kinase 2 | ENSG00000055332 | 5610   |
| 76.  | <i>UBL3</i>     | <b>1.29</b>  | Ubiquitin like 3                                          | ENSG00000122042 | 5412   |
| 77.  | <i>IFITM2</i>   | <b>1.28</b>  | Interferon induced transmembrane protein 2                | ENSG00000185201 | 10581  |
| 78.  | <i>CSNK2A1</i>  | <b>-1.22</b> | Casein kinase 2 alpha 1                                   | ENSG00000101266 | 1457   |
| 79.  | <i>ATP6V1D</i>  | <b>-1.26</b> | ATPase H <sup>+</sup> transporting V1 subunit D           | ENSG00000100554 | 51382  |
| 80.  | <i>MRPL46</i>   | <b>-1.28</b> | Mitochondrial ribosomal protein L46                       | ENSG00000259494 | 26589  |
| 81.  | <i>TWF2</i>     | <b>-1.30</b> | Twinfilin actin binding protein 2                         | ENSG00000247596 | 11344  |
| 82.  | <i>SCNN1A</i>   | <b>-1.32</b> | Sodium channel epithelial 1 subunit alpha                 | ENSG00000111319 | 6337   |
| 83.  | <i>MMP7</i>     | <b>-1.35</b> | Matrix metalloproteinase 7                                | ENSG00000137673 | 4316   |
| 84.  | <i>ANKRD39</i>  | <b>-1.37</b> | Ankyrin repeat domain 39                                  | ENSG00000213337 | 51239  |
| 85.  | <i>NGDN</i>     | <b>-1.43</b> | Neuroguidin                                               | ENSG00000129460 | 25983  |
| 86.  | <i>SYNRG</i>    | <b>-1.44</b> | Synergilin gamma                                          | ENSG00000275066 | 11276  |
| 87.  | <i>TDP2</i>     | <b>-1.44</b> | Tyrosyl-DNA phosphodiesterase 2                           | ENSG00000111802 | 51567  |
| 88.  | <i>BCAS2</i>    | <b>-1.45</b> | BCAS2 pre-mRNA processing factor                          | ENSG00000116752 | 10286  |
| 89.  | <i>TIMM8A</i>   | <b>-1.45</b> | Translocase of inner mitochondrial membrane 8A            | ENSG00000126953 | 1678   |
| 90.  | <i>PDPK1</i>    | <b>-1.45</b> | 3-phosphoinositide dependent protein kinase 1             | ENSG00000140992 | 5170   |
| 91.  | <i>ATP9A</i>    | <b>-1.46</b> | ATPase phospholipid transporting 9A (putative)            | ENSG00000054793 | 10079  |
| 92.  | <i>BET1</i>     | <b>-1.48</b> | Bet1 golgi vesicular membrane trafficking protein         | ENSG00000105829 | 10282  |
| 93.  | <i>PREPL</i>    | <b>-1.54</b> | Prolyl endopeptidase like                                 | ENSG00000138078 | 9581   |
| 94.  | <i>CDK10</i>    | <b>-1.57</b> | Cyclin dependent kinase 10                                | ENSG00000185324 | 8558   |
| 95.  | <i>TPCN1</i>    | <b>-1.62</b> | Two pore segment channel 1                                | ENSG00000186815 | 53373  |
| 96.  | <i>FAHD2B</i>   | <b>-1.67</b> | Fumarylacetoacetate hydrolase domain containing 2B        | ENSG00000144199 | 151313 |
| 97.  | <i>SPOUT1</i>   | <b>-1.68</b> | SPOUT domain containing methyltransferase 1               | ENSG00000198917 | 51490  |
| 98.  | <i>ASCC1</i>    | <b>-1.75</b> | Activating signal cointegrator 1 complex subunit 1        | ENSG00000138303 | 51008  |
| 99.  | <i>PNMA1</i>    | <b>-1.75</b> | PNMA family member 1                                      | ENSG00000176903 | 9240   |
| 100. | <i>WRN</i>      | <b>-1.77</b> | WRN RecQ like helicase                                    | ENSG00000165392 | 7486   |
| 101. | <i>MOAP1</i>    | <b>-1.83</b> | Modulator of apoptosis 1                                  | ENSG00000165943 | 64112  |
| 102. | <i>MMAA</i>     | <b>-1.96</b> | Metabolism of cobalamin associated A                      | ENSG00000151611 | 166785 |
| 103. | <i>FAM153CP</i> | <b>-2.06</b> | Protein FAM153C                                           | ENSG00000204677 | 653316 |

|      |                        |              |                                                          |                 |        |
|------|------------------------|--------------|----------------------------------------------------------|-----------------|--------|
| 104. | <i>ANKZF1</i>          | <b>-2.11</b> | Ankyrin repeat and zinc finger peptidyl tRNA hydrolase 1 | ENSG00000163516 | 55139  |
| 105. | <i>INTS9</i>           | <b>-2.15</b> | Integrator complex subunit 9                             | ENSG00000104299 | 55756  |
| 106. | <i>DPYD</i>            | <b>-2.20</b> | Dihydropyrimidine dehydrogenase                          | ENSG00000188641 | 1806   |
| 107. | <i>RIC3</i>            | <b>-2.36</b> | RIC3 acetylcholine receptor chaperone                    | ENSG00000166405 | 79608  |
| 108. | <i>TMEM51-AS1</i>      | <b>-2.85</b> | TMEM51 antisense RNA 1                                   | ENSG00000175147 | 200197 |
| 109. | <i>ENSG00000184809</i> | <b>-3.19</b> |                                                          | ENSG00000184809 |        |
| 110. | <i>SNAI3-AS1</i>       | <b>-3.23</b> | SNAI3 antisense RNA 1                                    | ENSG00000260630 | 197187 |
| 111. | <i>JRK</i>             | <b>-3.25</b> | Jrk helix-turn-helix protein                             | ENSG00000234616 | 8629   |
| 112. | <i>ENSG00000260669</i> | <b>-3.41</b> |                                                          | ENSG00000260669 |        |
| 113. | <i>MAP4K2</i>          | <b>-3.52</b> | Mitogen-activated protein kinase kinase kinase 2         | ENSG00000168067 | 5871   |
| 114. | <i>GOLGA6L4</i>        | <b>-4.20</b> | Golgin A6 family like 4                                  | ENSG00000184206 | 643707 |
| 115. | <i>CES4A</i>           | <b>-4.55</b> | Carboxylesterase 4A                                      | ENSG00000172824 | 283848 |
| 116. | <i>POLR2J4</i>         | <b>-5.86</b> | RNA polymerase II subunit J4, pseudogene                 | ENSG00000214783 | 84820  |
| 117. | <i>WDR27</i>           | <b>-7.64</b> | WD repeat domain 27                                      | ENSG00000184465 | 253769 |

**Supplementary Table S4.** List of significantly differentially regulated genes (Total: 97; upregulated: 47; down-regulated: 50) in the alveolar mucosa model developed at air-liquid interface (alv-ALI). alv-ALI was exposed to 10nM recombinant SARS-CoV-2 spike glycoprotein S1 (S1 protein) for 24 hours and compared to sham. n= 6 per exposure condition; significance: p<0.01. An additional filter was applied for expression >0 in at least 5 samples in at least one group.

|     | Symbol or ID           | Fold-change  | Description                                          | Ensembl gene ID | Entrez    |
|-----|------------------------|--------------|------------------------------------------------------|-----------------|-----------|
| 1.  | <i>ENSG00000256825</i> | <b>26.79</b> |                                                      | ENSG00000256825 |           |
| 2.  | <i>SRGN</i>            | <b>15.01</b> | Serglycin                                            | ENSG00000122862 | 5552      |
| 3.  | <i>STRIP2</i>          | <b>4.13</b>  | Striatin interacting protein 2                       | ENSG00000128578 | 57464     |
| 4.  | <i>USP3-AS1</i>        | <b>3.83</b>  | USP3 antisense RNA 1                                 | ENSG00000259248 | 100130855 |
| 5.  | <i>WDR27</i>           | <b>3.42</b>  | WD repeat domain 27                                  | ENSG00000184465 | 253769    |
| 6.  | <i>NDUFC2-KCTD14</i>   | <b>3.33</b>  | NDUFC2-KCTD14 readthrough                            | ENSG00000259112 | 100532726 |
| 7.  | <i>AKAP12</i>          | <b>3.13</b>  | A-kinase anchoring protein 12                        | ENSG00000131016 | 9590      |
| 8.  | <i>CCN2</i>            | <b>3.11</b>  | Cellular communication network factor 2              | ENSG00000118523 | 1490      |
| 9.  | <i>GNPDA2</i>          | <b>3.02</b>  | Glucosamine-6-phosphate deaminase 2                  | ENSG00000163281 | 132789    |
| 10. | <i>ABHD6</i>           | <b>2.96</b>  | Abhydrolase domain containing 6, acylglycerol lipase | ENSG00000163686 | 57406     |
| 11. | <i>ALOX12-AS1</i>      | <b>2.45</b>  | ALOX12 antisense RNA 1                               | ENSG00000215067 | 100506713 |
| 12. | <i>PEAK1</i>           | <b>2.42</b>  | Pseudopodium enriched atypical kinase 1              | ENSG00000173517 | 79834     |
| 13. | <i>ENSG00000263731</i> | <b>2.36</b>  |                                                      | ENSG00000263731 |           |
| 14. | <i>CLDN11</i>          | <b>2.20</b>  | Claudin 11                                           | ENSG0000013297  | 5010      |
| 15. | <i>CAAP1</i>           | <b>2.01</b>  | Caspase activity and apoptosis inhibitor 1           | ENSG00000120159 | 79886     |
| 16. | <i>AMPD2</i>           | <b>2.00</b>  | Adenosine monophosphate deaminase 2                  | ENSG00000116337 | 271       |

|     |                 |              |                                                              |                 |           |
|-----|-----------------|--------------|--------------------------------------------------------------|-----------------|-----------|
| 17. | <i>ASDURF</i>   | <b>1.94</b>  | ASNSD1 upstream open reading frame                           | ENSG00000286053 | 110599588 |
| 18. | <i>KAT14</i>    | <b>1.92</b>  | Lysine acetyltransferase 14                                  | ENSG00000149474 | 57325     |
| 19. | <i>IDE</i>      | <b>1.85</b>  | Insulin degrading enzyme                                     | ENSG00000119912 | 3416      |
| 20. | <i>FANCI</i>    | <b>1.84</b>  | FA complementation group I                                   | ENSG00000140525 | 55215     |
| 21. | <i>TIGAR</i>    | <b>1.83</b>  | TP53 induced glycolysis regulatory phosphatase               | ENSG00000078237 | 57103     |
| 22. | <i>RN7SK</i>    | <b>1.79</b>  | RNA component of 7SK nuclear ribonucleoprotein               | ENSG00000202198 | 125050    |
| 23. | <i>CEP78</i>    | <b>1.79</b>  | Centrosomal protein 78                                       | ENSG00000148019 | 84131     |
| 24. | <i>GLIPR1</i>   | <b>1.78</b>  | GLI pathogenesis related 1                                   | ENSG00000139278 | 11010     |
| 25. | <i>CCDC24</i>   | <b>1.71</b>  | Coiled-coil domain containing 24                             | ENSG00000159214 | 149473    |
| 26. | <i>HELLS</i>    | <b>1.70</b>  | Helicase, lymphoid specific                                  | ENSG00000119969 | 3070      |
| 27. | <i>GNL3</i>     | <b>1.69</b>  | G protein nucleolar 3                                        | ENSG00000163938 | 26354     |
| 28. | <i>CC2D1B</i>   | <b>1.67</b>  | Coiled-coil and C2 domain containing 1B                      | ENSG00000154222 | 200014    |
| 29. | <i>NIPAL1</i>   | <b>1.59</b>  | NIPA like domain containing 1                                | ENSG00000163293 | 152519    |
| 30. | <i>CALCOCO1</i> | <b>1.57</b>  | Calcium binding and coiled-coil domain 1                     | ENSG00000012822 | 57658     |
| 31. | <i>ADO</i>      | <b>1.53</b>  | 2-aminoethanethiol dioxygenase                               | ENSG00000181915 | 84890     |
| 32. | <i>THAP3</i>    | <b>1.53</b>  | THAP domain containing 3                                     | ENSG00000041988 | 90326     |
| 33. | <i>GON4L</i>    | <b>1.49</b>  | Gon-4 like                                                   | ENSG00000116580 | 54856     |
| 34. | <i>HERC4</i>    | <b>1.48</b>  | HECT and RLD domain containing E3 ubiquitin protein ligase 4 | ENSG00000148634 | 26091     |
| 35. | <i>MEN1</i>     | <b>1.46</b>  | Menin 1                                                      | ENSG00000133895 | 4221      |
| 36. | <i>ACBD6</i>    | <b>1.46</b>  | Acyl-CoA binding domain containing 6                         | ENSG00000230124 | 84320     |
| 37. | <i>TMX2</i>     | <b>1.44</b>  | Thioredoxin related transmembrane protein 2                  | ENSG00000213593 | 51075     |
| 38. | <i>DNMT1</i>    | <b>1.44</b>  | DNA methyltransferase 1                                      | ENSG00000130816 | 1786      |
| 39. | <i>NBN</i>      | <b>1.43</b>  | Nibrin                                                       | ENSG00000104320 | 4683      |
| 40. | <i>POLR2M</i>   | <b>1.43</b>  | RNA polymerase II subunit M                                  | ENSG00000255529 | 81488     |
| 41. | <i>PNN</i>      | <b>1.42</b>  | Pinin, desmosome associated protein                          | ENSG00000100941 | 5411      |
| 42. | <i>FBXO33</i>   | <b>1.42</b>  | F-box protein 33                                             | ENSG00000165355 | 254170    |
| 43. | <i>CDK11A</i>   | <b>1.39</b>  | Cyclin dependent kinase 11A                                  | ENSG00000008128 | 728642    |
| 44. | <i>TMEM131</i>  | <b>1.39</b>  | Transmembrane protein 131                                    | ENSG00000075568 | 23505     |
| 45. | <i>CHD1L</i>    | <b>1.35</b>  | Chromodomain helicase DNA binding protein 1 like             | ENSG00000131778 | 9557      |
| 46. | <i>ATL2</i>     | <b>1.34</b>  | atlastin GTPase 2                                            | ENSG00000119787 | 64225     |
| 47. | <i>RSU1</i>     | <b>1.33</b>  | Ras suppressor protein 1                                     | ENSG00000148484 | 6251      |
| 48. | <i>PLEKHB2</i>  | <b>-1.25</b> | Pleckstrin homology domain containing B2                     | ENSG00000115762 | 55041     |
| 49. | <i>PKN1</i>     | <b>-1.31</b> | Protein kinase N1                                            | ENSG00000123143 | 5585      |
| 50. | <i>BBC3</i>     | <b>-1.34</b> | BCL2 binding component 3                                     | ENSG00000105327 | 27113     |
| 51. | <i>MYH9</i>     | <b>-1.36</b> | Myosin heavy chain 9                                         | ENSG00000100345 | 4627      |
| 52. | <i>MRM1</i>     | <b>-1.39</b> | Mitochondrial rRNA methyltransferase 1                       | ENSG00000278619 | 79922     |
| 53. | <i>TMEM181</i>  | <b>-1.40</b> | Transmembrane protein 181                                    | ENSG00000146433 | 57583     |

|     |                        |              |                                                         |                 |           |
|-----|------------------------|--------------|---------------------------------------------------------|-----------------|-----------|
| 54. | <i>RNF141</i>          | <b>-1.42</b> | Ring finger protein 141                                 | ENSG00000110315 | 50862     |
| 55. | <i>AKR7A2</i>          | <b>-1.43</b> | Aldo-keto reductase family 7 member A2                  | ENSG00000053371 | 8574      |
| 56. | <i>RCOR3</i>           | <b>-1.47</b> | REST corepressor 3                                      | ENSG00000117625 | 55758     |
| 57. | <i>OTULINL</i>         | <b>-1.50</b> | OTU deubiquitinase with linear linkage specificity like | ENSG00000145569 | 54491     |
| 58. | <i>LHFPL2</i>          | <b>-1.50</b> | LHFPL tetraspan subfamily member 2                      | ENSG00000145685 | 10184     |
| 59. | <i>GARRE1</i>          | <b>-1.51</b> | Granule associated Rac and RHOG effector 1              | ENSG00000166398 | 9710      |
| 60. | <i>NNMT</i>            | <b>-1.52</b> | Nicotinamide N-methyltransferase                        | ENSG00000166741 | 4837      |
| 61. | <i>C19orf12</i>        | <b>-1.53</b> | Chromosome 19 open reading frame 12                     | ENSG00000131943 | 83636     |
| 62. | <i>ENSG00000273272</i> | <b>-1.54</b> |                                                         | ENSG00000273272 |           |
| 63. | <i>ENSG00000283103</i> | <b>-1.54</b> |                                                         | ENSG00000283103 |           |
| 64. | <i>TCP11L2</i>         | <b>-1.56</b> | T-complex 11 like 2                                     | ENSG00000166046 | 255394    |
| 65. | <i>VPS45</i>           | <b>-1.62</b> | Vacuolar protein sorting 45 homolog                     | ENSG00000136631 | 11311     |
| 66. | <i>TNFSF13</i>         | <b>-1.71</b> | TNF superfamily member 13                               | ENSG00000161955 | 8741      |
| 67. | <i>ZNF12</i>           | <b>-1.73</b> | Zinc finger protein 12                                  | ENSG00000164631 | 7559      |
| 68. | <i>ACOX3</i>           | <b>-1.76</b> | Acyl-CoA oxidase 3, pristanoyl                          | ENSG00000087008 | 8310      |
| 69. | <i>LYPD2</i>           | <b>-1.81</b> | LY6/PLAUR domain containing 2                           | ENSG00000197353 | 137797    |
| 70. | <i>RALY-AS1</i>        | <b>-1.86</b> | RALY antisense RNA 1                                    | ENSG00000285230 | 101926888 |
| 71. | <i>PTPN3</i>           | <b>-1.86</b> | Protein tyrosine phosphatase non-receptor type 3        | ENSG00000070159 | 5774      |
| 72. | <i>LOC100128398</i>    | <b>-1.88</b> | Uncharacterized LOC100128398                            | ENSG00000176593 | 100128398 |
| 73. | <i>GNLY</i>            | <b>-1.99</b> | Granulysin                                              | ENSG00000115523 | 10578     |
| 74. | <i>PHTF1</i>           | <b>-2.05</b> | Putative homeodomain transcription factor 1             | ENSG00000116793 | 10745     |
| 75. | <i>ENSG00000272667</i> | <b>-2.07</b> |                                                         | ENSG00000272667 |           |
| 76. | <i>MISP3</i>           | <b>-2.12</b> | MISP family member 3                                    | ENSG00000141854 | 113230    |
| 77. | <i>CXCL14</i>          | <b>-2.13</b> | C-X-C motif chemokine ligand 14                         | ENSG00000145824 | 9547      |
| 78. | <i>SMIM11</i>          | <b>-2.17</b> | Small integral membrane protein 11                      | ENSG00000205670 | 54065     |
| 79. | <i>FOS</i>             | <b>-2.18</b> | Fos proto-oncogene, AP-1 transcription factor subunit   | ENSG00000170345 | 2353      |
| 80. | <i>ENSG00000250903</i> | <b>-2.24</b> |                                                         | ENSG00000250903 |           |
| 81. | <i>TRNE</i>            | <b>-2.53</b> | tRNA                                                    | ENSG00000210194 | 4556      |
| 82. | <i>ZNF860</i>          | <b>-2.88</b> | Zinc finger protein 860                                 | ENSG00000197385 | 344787    |
| 83. | <i>TMEM67</i>          | <b>-2.99</b> | Transmembrane protein 67                                | ENSG00000164953 | 91147     |
| 84. | <i>ENSG00000272279</i> | <b>-3.03</b> |                                                         | ENSG00000272279 |           |
| 85. | <i>CIB2</i>            | <b>-3.06</b> | Calcium and integrin binding family member 2            | ENSG00000136425 | 10518     |
| 86. | <i>CHURC1-FNTB</i>     | <b>-3.17</b> | CHURC1-FNTB readthrough                                 | ENSG00000125954 | 100529261 |
| 87. | <i>ENSG00000258311</i> | <b>-3.27</b> |                                                         | ENSG00000258311 |           |
| 88. | <i>ENSG00000255121</i> | <b>-3.53</b> |                                                         | ENSG00000255121 |           |
| 89. | <i>PSMA2</i>           | <b>-4.11</b> | Proteasome 20S subunit alpha 2                          | ENSG00000256646 | 5683      |
| 90. | <i>ENSG00000255641</i> | <b>-4.16</b> |                                                         | ENSG00000255641 |           |

|     |                        |               |                                             |                 |        |
|-----|------------------------|---------------|---------------------------------------------|-----------------|--------|
| 91. | <i>BFSP1</i>           | <b>-4.33</b>  | Beaded filament structural protein<br>1     | ENSG00000125864 | 631    |
| 92. | <i>ENSG00000254929</i> | <b>-4.90</b>  |                                             | ENSG00000254929 |        |
| 93. | <i>SLC35A3</i>         | <b>-5.70</b>  | Solute carrier family 35 member<br>A3       | ENSG00000283761 | 23443  |
| 94. | <i>GNB4</i>            | <b>-5.99</b>  | G protein subunit beta 4                    | ENSG00000114450 | 59345  |
| 95. | <i>ENSG00000274204</i> | <b>-5.99</b>  |                                             | ENSG00000274204 |        |
| 96. | <i>RGPD6</i>           | <b>-7.51</b>  | RANBP2 like and GRIP domain<br>containing 6 | ENSG00000183054 | 729540 |
| 97. | <i>ENSG00000265257</i> | <b>-10.61</b> |                                             | ENSG00000265257 |        |

### Reference:

1. Robinson, M. D. M., D.J.; Smyth, G.K. , edgeR: a Bioconductor package for differential expression analysis of digital gene expression data. *Bioinformatics* **2010**, *26*(1): (1), pp139-40.
